# Supplementary material for: Novel (3,6)-connected network and (4,6)-connected framework in two copper(II) and cadmium(II) complexes of flexible (2S,3S,4R,5R)-tetrahydrofurantetracarboxylic acid: synthesis, structure, thermostability, and luminescence studies
Source: Royal Society of Chemistry journal article supplement (doi:10.1039/b905794c), 2009-01-01
Supplement: b905794c.pdf [file b905794c.pdf]

## Supporting Information

# Novel (3,6)-connected network and (4,6)-connected framework in two Copper(II) and Cadmium(II) complexes of flexible (2*S*,3*S*,4*R*,5*R*)-tetrahydrofuran tetracarboxylic acid: synthesis, structure, thermostability, and luminescence studies

Lei Zhang, Zhao-Ji Li, Qi-Pu Lin, Jian Zhang, Pei-Xiu Yin, Ye-Yan Qin, Jian-Kai Cheng and Yuan-Gen Yao\*

*State Key Laboratory of Structural Chemistry, Fujian Institute of Research on the Structure of Matter, The Chinese Academy of Sciences, Fuzhou, Fujian 350002, China. E-mail: [yyg@fjirsm.ac.cn](mailto:yyg@fjirsm.ac.cn)*

*Graduate School of The Chinese Academy of Sciences, Beijing, China.*

**Table S1.** Selected Bond Lengths (Å) and Band Angles (°) for Complexes **1** and **2**

| Complex 1           |            |                     |            |
|---------------------|------------|---------------------|------------|
| Cu(1)-O(3)#1        | 1.931(3)   | Cu(2)-O(5)#2        | 1.954(3)   |
| Cu(1)-O(6)#2        | 1.944(3)   | Cu(2)-O(2)#3        | 1.979(3)   |
| Cu(1)-O(1)          | 1.971(3)   | Cu(2)-N(1)          | 2.005(4)   |
| Cu(1)-O(8)          | 1.996(3)   | Cu(2)-N(2)          | 2.019(4)   |
| Cu(1)-O(9)          | 2.264(3)   | Cu(2)-O(8)          | 2.268(3)   |
| O(3)#1-Cu(1)-O(6)#2 | 91.01(14)  | O(5)#2-Cu(2)-O(2)#3 | 92.86(13)  |
| O(3)#1-Cu(1)-O(1)   | 87.94(14)  | O(5)#2-Cu(2)-N(1)   | 165.04(15) |
| O(6)#2-Cu(1)-O(1)   | 171.10(13) | O(2)#3-Cu(2)-N(1)   | 94.40(16)  |
| O(3)#1-Cu(1)-O(8)   | 149.27(14) | O(5)#2-Cu(2)-N(2)   | 88.80(15)  |
| O(6)#2-Cu(1)-O(8)   | 98.56(13)  | O(2)#3-Cu(2)-N(2)   | 172.44(15) |
| O(1)-Cu(1)-O(8)     | 86.74(13)  | N(1)-Cu(2)-N(2)     | 82.37(17)  |
| O(3)#1-Cu(1)-O(9)   | 129.11(13) | O(5)#2-Cu(2)-O(8)   | 97.89(12)  |
| O(6)#2-Cu(1)-O(9)   | 96.01(12)  | O(2)#3-Cu(2)-O(8)   | 84.96(12)  |
| O(1)-Cu(1)-O(9)     | 77.90(11)  | N(1)-Cu(2)-O(8)     | 95.77(14)  |
| O(8)-Cu(1)-O(9)     | 79.06(11)  | N(2)-Cu(2)-O(8)     | 102.12(13) |

Symmetry codes: #1 = -x-2,y-1/2,-z+1/2; #2 = -x-1,y-1/2,-z+1/2; #3 = x+1,y,z.

  

| Complex 2    |          |              |          |
|--------------|----------|--------------|----------|
| O(1W)-Cd(1)  | 2.255(4) | O(3W)-Cd(2)  | 2.320(3) |
| O(1)-Cd(1)   | 2.439(2) | O(8)-Cd(2)   | 2.224(3) |
| O(2W)-Cd(1)  | 2.313(3) | Cd(2)-O(6)#6 | 2.304(3) |
| O(2)-Cd(1)   | 2.334(3) | Cd(2)-O(5)#7 | 2.345(3) |
| O(2)-Cd(1)#1 | 2.460(3) | Cd(2)-O(7)#4 | 2.359(3) |

|                     |            |                     |            |
|---------------------|------------|---------------------|------------|
| O(3)-Cd(1)#1        | 2.407(3)   | Cd(2)-O(4)#7        | 2.520(3)   |
| O(9)-Cd(1)          | 2.295(3)   | Cd(2)-O(6)#4        | 2.580(3)   |
| O(1W)-Cd(1)-O(9)    | 164.87(13) | O(8)-Cd(2)-O(6)#6   | 91.51(10)  |
| O(1W)-Cd(1)-O(2W)   | 89.98(14)  | O(8)-Cd(2)-O(3W)    | 170.42(10) |
| O(9)-Cd(1)-O(2W)    | 85.46(12)  | O(6)#6-Cd(2)-O(3W)  | 86.71(10)  |
| O(1W)-Cd(1)-O(2)    | 83.84(12)  | O(8)-Cd(2)-O(5)#7   | 93.37(10)  |
| O(9)-Cd(1)-O(2)     | 92.89(10)  | O(6)#6-Cd(2)-O(5)#7 | 104.19(9)  |
| O(2W)-Cd(1)-O(2)    | 149.92(10) | O(3W)-Cd(2)-O(5)#7  | 77.97(10)  |
| O(1W)-Cd(1)-O(3)#5  | 96.85(15)  | O(8)-Cd(2)-O(7)#4   | 99.78(9)   |
| O(9)-Cd(1)-O(3)#5   | 96.94(11)  | O(6)#6-Cd(2)-O(7)#4 | 124.09(9)  |
| O(2W)-Cd(1)-O(3)#5  | 131.77(10) | O(3W)-Cd(2)-O(7)#4  | 88.98(10)  |
| O(2)-Cd(1)-O(3)#5   | 78.27(9)   | O(5)#7-Cd(2)-O(7)#4 | 129.16(9)  |
| O(1W)-Cd(1)-O(1)    | 96.14(12)  | O(8)-Cd(2)-O(4)#7   | 87.39(10)  |
| O(9)-Cd(1)-O(1)     | 68.98(8)   | O(6)#6-Cd(2)-O(4)#7 | 157.42(9)  |
| O(2W)-Cd(1)-O(1)    | 82.66(10)  | O(3W)-Cd(2)-O(4)#7  | 90.64(10)  |
| O(2)-Cd(1)-O(1)     | 68.86(8)   | O(5)#7-Cd(2)-O(4)#7 | 53.43(9)   |
| O(3)#5-Cd(1)-O(1)   | 142.96(8)  | O(7)#4-Cd(2)-O(4)#7 | 78.22(9)   |
| O(1W)-Cd(1)-O(2)#5  | 100.89(13) | O(8)-Cd(2)-O(6)#4   | 106.77(10) |
| O(9)-Cd(1)-O(2)#5   | 92.35(10)  | O(6)#6-Cd(2)-O(6)#4 | 72.14(10)  |
| O(2W)-Cd(1)-O(2)#5  | 78.59(10)  | O(3W)-Cd(2)-O(6)#4  | 81.65(10)  |
| O(2)-Cd(1)-O(2)#5   | 131.49(5)  | O(5)#7-Cd(2)-O(6)#4 | 159.49(10) |
| O(3)#5-Cd(1)-O(2)#5 | 53.22(8)   | O(7)#4-Cd(2)-O(6)#4 | 52.11(8)   |
| O(1)-Cd(1)-O(2)#5   | 154.54(8)  | O(4)#7-Cd(2)-O(6)#4 | 129.63(9)  |

Symmetry codes: #1 =  $x, -y - 1/2, z - 1/2$ ; #4 =  $-x, -y, -z + 2$ ; #5 =  $x, -y - 1/2, z + 1/2$ ;

#6 =  $x - 1, y, z$ ; #7 =  $x, y, z + 1$ .

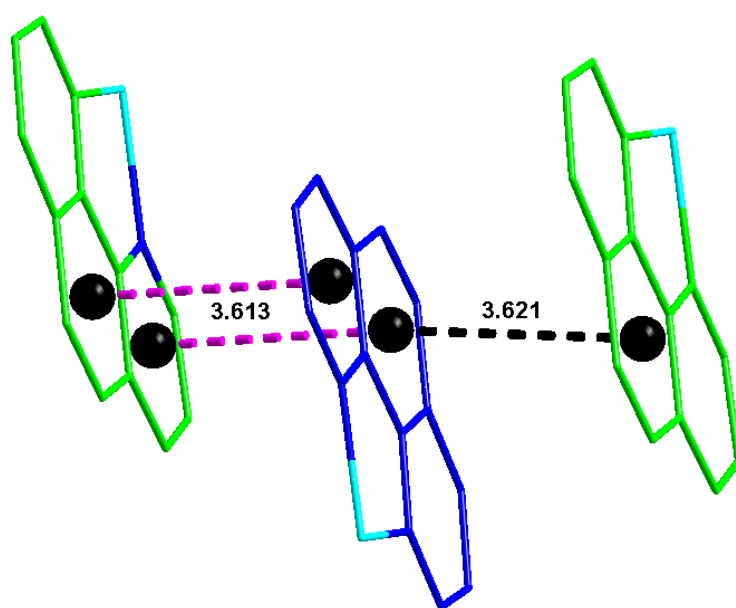

**Fig. S1**  $\pi$ - $\pi$  interactions of phen in complexes **1**.

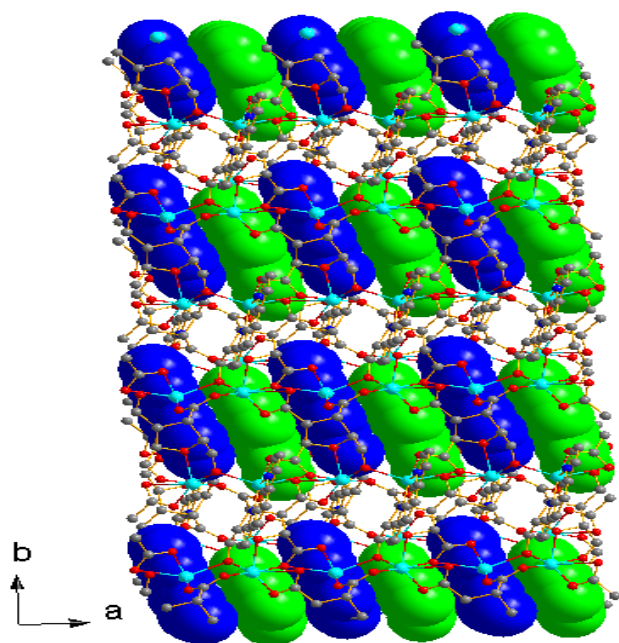

**Fig. S2** View of the  $\pi$ - $\pi$  stacking of phen in complexes **1** (green and blue are phen ligands in different layers).

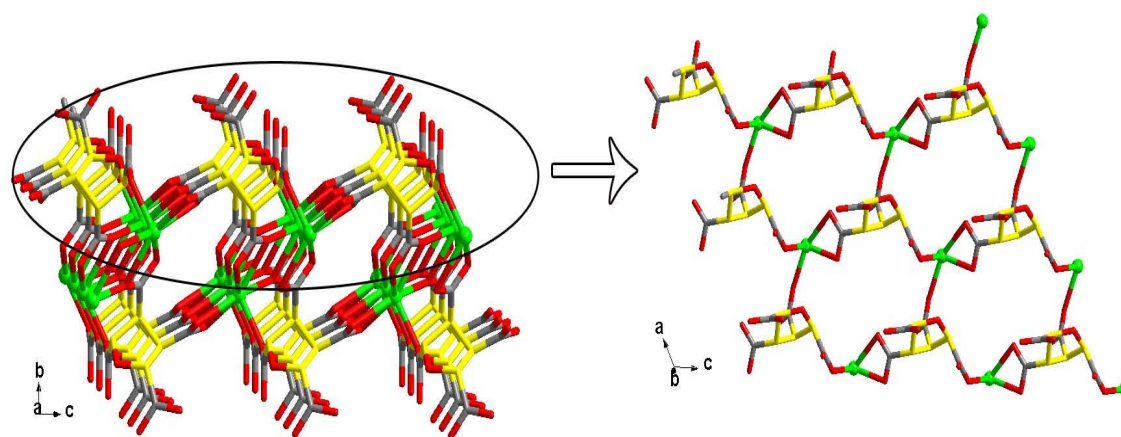

**Fig. S3** View of the (6,3)-(THFTCA-Cd<sub>2</sub>)-sheet (right) and the 2D THFTCA-Cd<sub>2</sub>-THFTCA double-layer (left) in complexes **2**.
